# Supplementary material for: Behaviour of electric and magnetic dipole transitions of Eu3+, 5D0 → 7F0 and Eu–O charge transfer band in Li+ co-doped YPO4:Eu3+
Source: Royal Society of Chemistry journal article supplement (doi:10.1039/c2ra22144f), 2012-01-01
Supplement: c2ra22144f.pdf [file c2ra22144f.pdf]

## Electronic Supplementary Information (ESI)

### Behaviour of electric and magnetic dipole transitions of $\text{Eu}^{3+}$ , $^5\text{D}_0 \rightarrow ^7\text{F}_0$ and Eu-O charge transfer band in $\text{Li}^+$ co-doped $\text{YPO}_4:\text{Eu}^{3+}$

A. K. Parchur<sup>1</sup> and R. S. Ningthoujam<sup>2\*</sup>

<sup>1</sup>*Department of Physics, Banaras Hindu University, Varanasi-221005, India*

<sup>2</sup>*Chemistry Division, Bhabha Atomic Research Centre, Mumbai-400085, India*

*This paper is dedicated to Professor N. S. Gajbhiye on the occasion of his 60<sup>th</sup> birthday*

\* Authors to whom correspondence should be addressed

Phone: +91-22-2559321 and Fax: +91-22-25505151.

E-mail: nraghu\_man@yahoo.co.in/rsn@barc.gov.in (R. S. Ningthoujam)

**Table S1** Parameters obtained after mono-exponential equation fitting to decay data.

| Sample | $\text{Li}^+$ (at.%) | $I_l$ | $\tau_l$ (ms) | $\chi^2$ |
|--------|----------------------|-------|---------------|----------|
| 900 °C | 0                    | 461   | 2.723         | 4.067    |
|        | 3                    | 453   | 3.107         | 3.401    |
|        | 10                   | 387   | 2.450         | 3.072    |

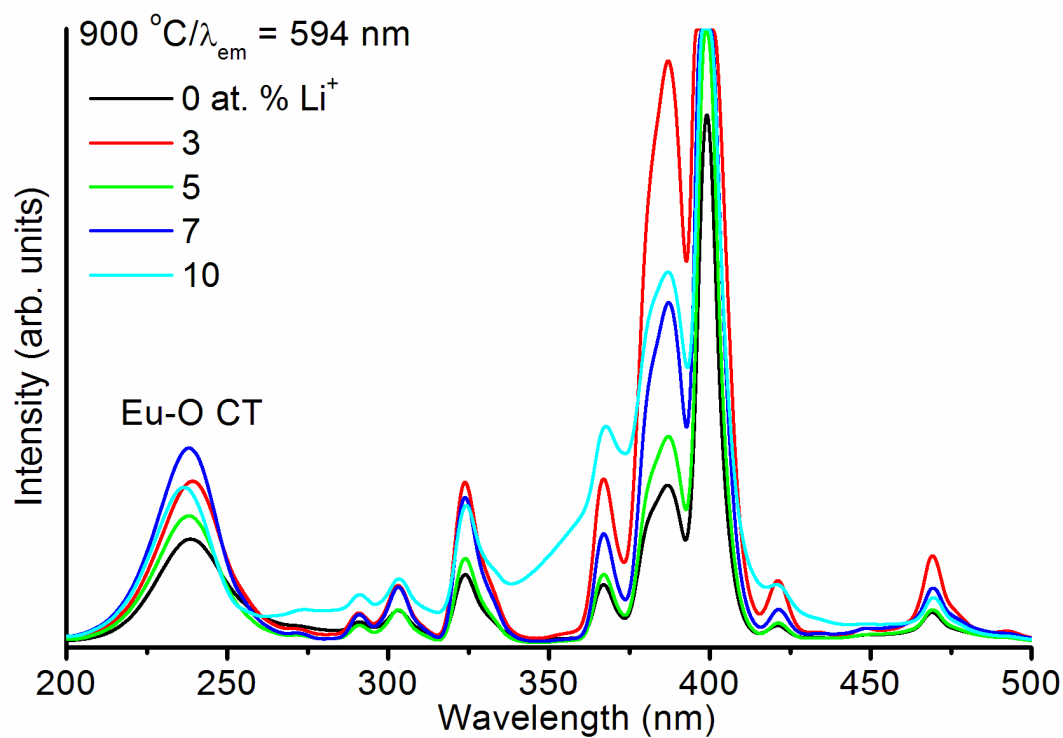

**Figure S1** Excitation spectrum (monitoring emission at 594 nm) of  $\text{Li}^+$  co-doped  $\text{YPO}_4:5\text{Eu}$  ( $\text{Li}^+ = 0, 3, 5, 7$  and  $10$  at. %).

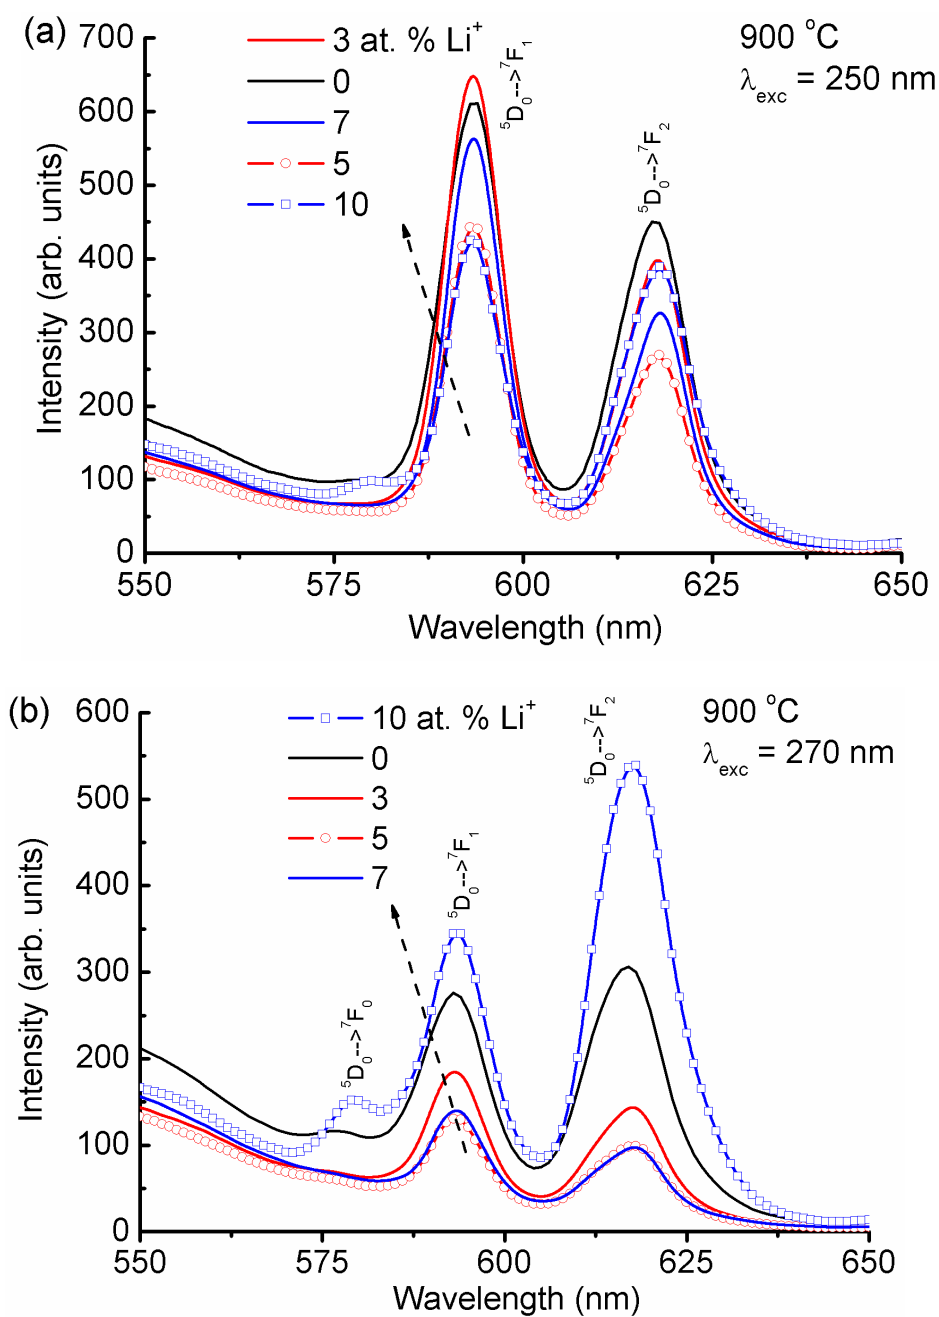

**Figure S2 (a and b)** Emission spectra of  $\text{Li}^+$  co-doped  $\text{YPO}_4:5\text{Eu}$  samples ( $\text{Li}^+ = 0, 3, 5, 7$  and  $10 \text{ at. \%}$ ) under 250 and 270 nm excitation, respectively.

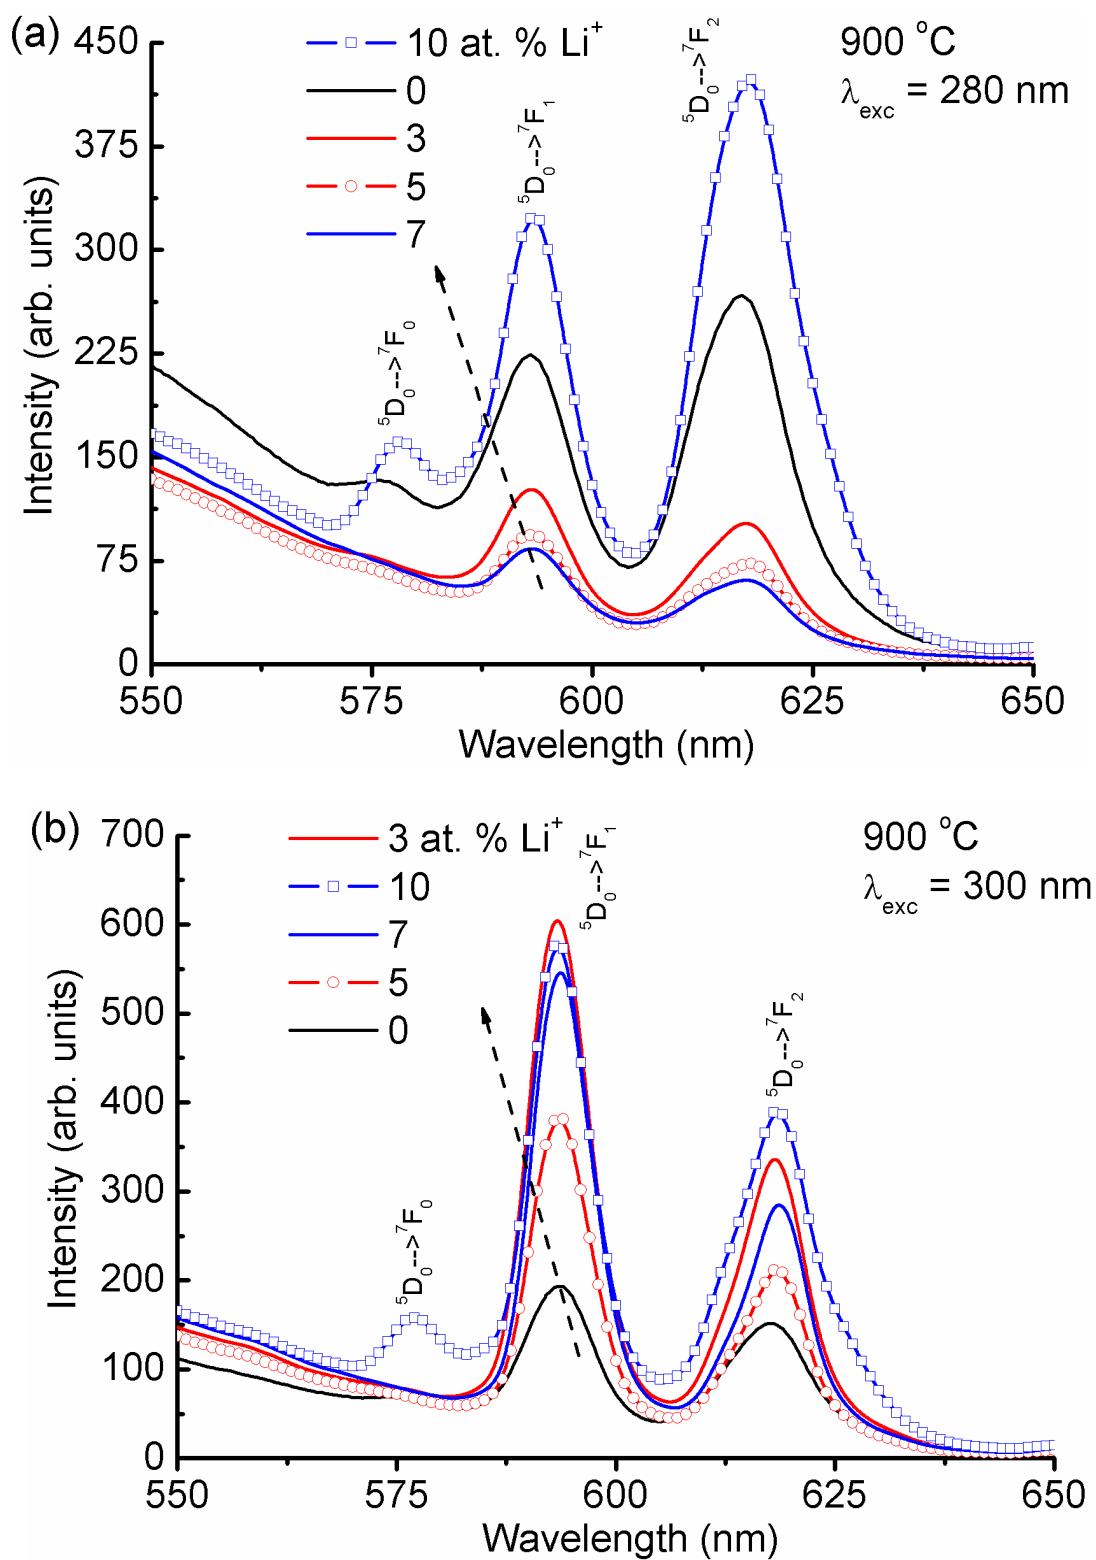

**Figure S3 (a and b)** Emission spectra of  $\text{Li}^+$  co-doped  $\text{YPO}_4:5\text{Eu}$  samples ( $\text{Li}^+ = 0, 3, 5, 7$  and  $10 \text{ at.}\%$ ) under  $280$  and  $300 \text{ nm}$  excitation, respectively.

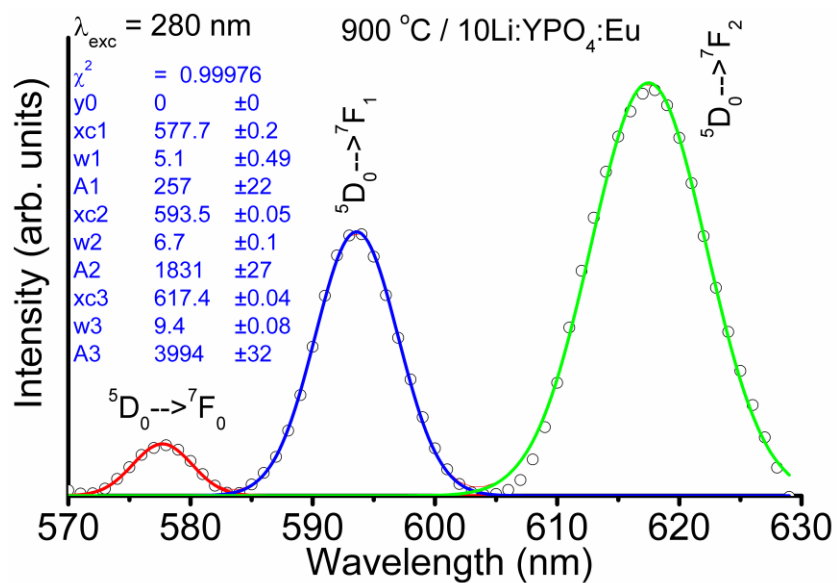

**Figure S4** Gaussian distribution fitting to  $^5D_0 \rightarrow ^7F_0$  (570–583 nm),  $^5D_0 \rightarrow ^7F_1$  (583–603 nm) and  $^5D_0 \rightarrow ^7F_2$  (603–630 nm) transitions data of 10 at.%  $\text{Li}^+$  co-doped  $\text{YPO}_4\text{:Eu}$  after baseline correction. Excitation wavelength is at 280 nm. The fitting parameters have given in figure itself.

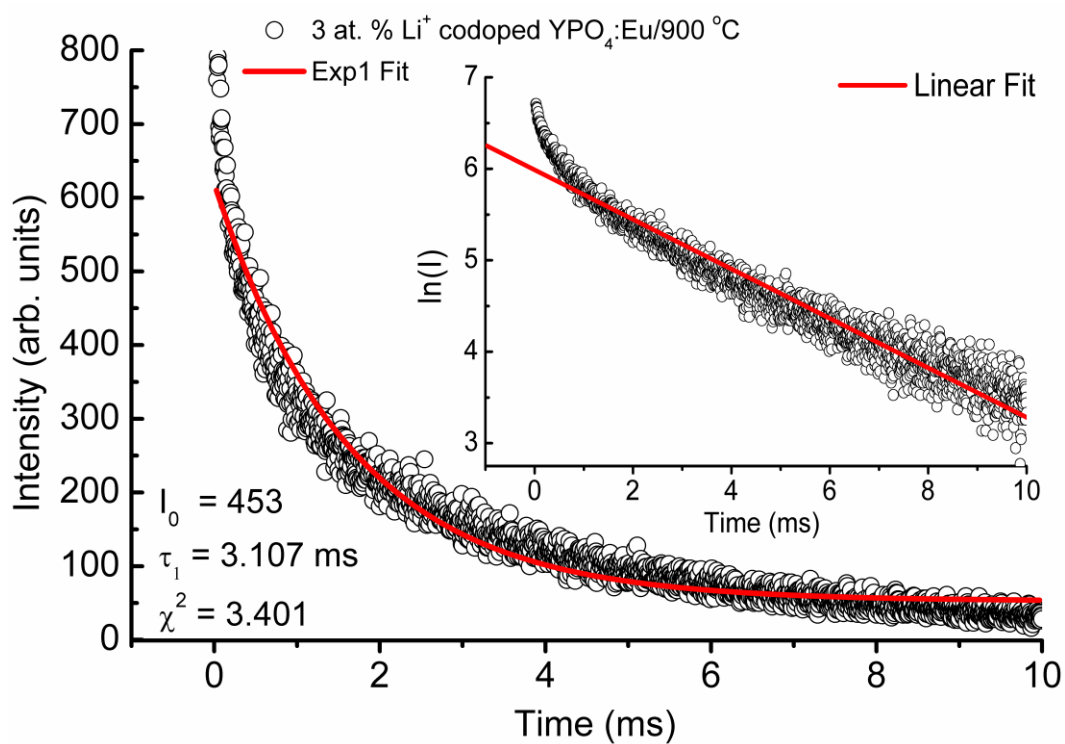

**Figure S5** Mono-exponential fittings to luminescence decay data of 3 at. % Li<sup>+</sup> co-doped YPO<sub>4</sub>:Eu. Fitting parameters are shown in their figures. Inset shows the ln(I) vs. t plot for same data.
